# Supplementary material
Source: publisher site journal article supplement (https://www.dovepress.com/article/502188)
Supplement: Supplementary file 1 [file get_supplementary_file.php]

| **Drug** | **Equivalent dose (mg)** | **Low-dose (mg)** | **High-dose (mg)** |
| --- | --- | --- | --- |
| Dexamethasone | 0.75 | ≤6 | >6 |
| Cortisone | 25 | ≤200 | >200 |
| Hydrocortisone | 20 | ≤160 | >160 |
| Prednis(ol)one | 5 | ≤40 | >40 |
| Methylprednisolone | 4 | ≤32 | >32 |
| Bethamethasone | 0.75 | ≤6 | >6 |

**Supplementary Table 1.** Equivalent corticosteroids and dosages (total daily dosing)a.

aThis table shows the equivalent corticosteroids and dosages. The equivalent dose is derived from Farmacotherapeutisch Kompas.1

1. Farmacotherapeutisch Kompas. Zorginstituut Nederland. [2025-02-02]. https://www.farmacotherapeutischkompas.nl/bladeren/groepsteksten/corticosteroiden__systemisc
